# Supplementary material
Source: PubMed Central journal article supplement (PMC3647383)
Supplement: NIHMS457008-supplement-1.pdf [file NIHMS457008-supplement-1.pdf]

## **Supplemental Figure Legends.**

**Supplemental Figure 1. STING but neither NOD2 nor DDX41 confers responsiveness of 293T cells to DMXAA.** 293T cells were transfected with either empty vector, mSTING, mNOD2, hNOD2, DDX41 or MyD88 as indicated in the presence of either an IFN- $\beta$  (A) or NF $\kappa$ B (B) luciferase reporter gene. Transfected cells were stimulated with DMXAA at the doses indicated for 18 hours and luciferase activity was measured. Data are presented as the mean  $\pm$  s.e.m of one experiment representative of three experiments

**Supplemental Figure 2 Sequence alignment of the human and mouse STING.** Identical residues are marked with “\*”, conserved residues with “:”, and partially conserved with “.”. Residues involved in c-di-GMP binding in hSTING and their mSTING counterparts are in red, those at the dimerization interface in green, those shown to be essential for signaling but not for c-di-GMP binding in yellow.

**Supplemental Fig 3. Ribbon diagram of the human STING CTD structure.** The two STING CTDs are colored green and cyan, respectively. The bound c-di-GMP is shown in sticks (orange), and residues different between human and mouse STING are shown in space-filling spheres, which are distal to the c-di-GMP binding pocket.

**Supplemental Fig 4. Ribbon diagram of a hypothetical model of the STING CTD in complex with DMXAA.** The two STING CTDs are colored green and cyan, respectively. The bound DMXAA molecules are shown in sticks (orange).

**A.**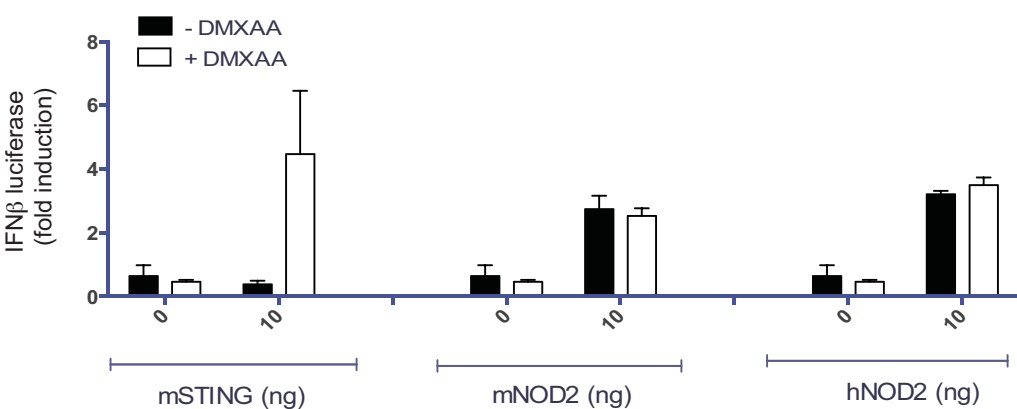**B.**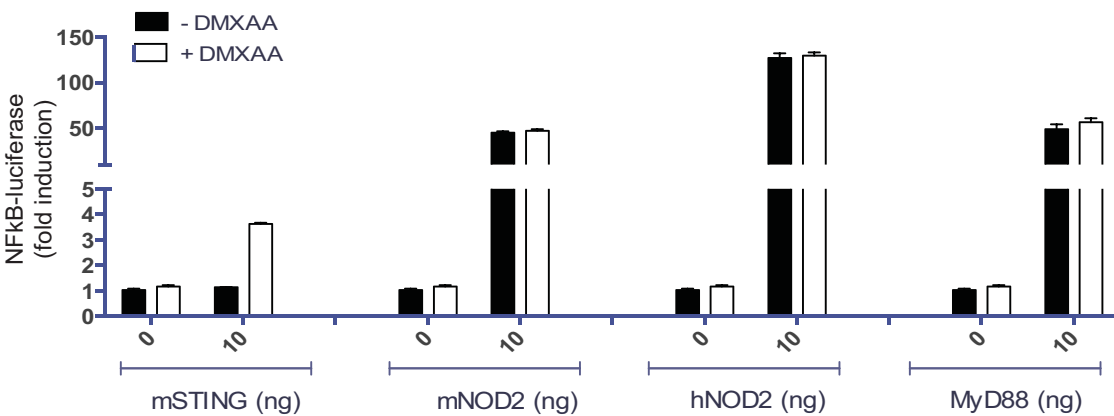**C.**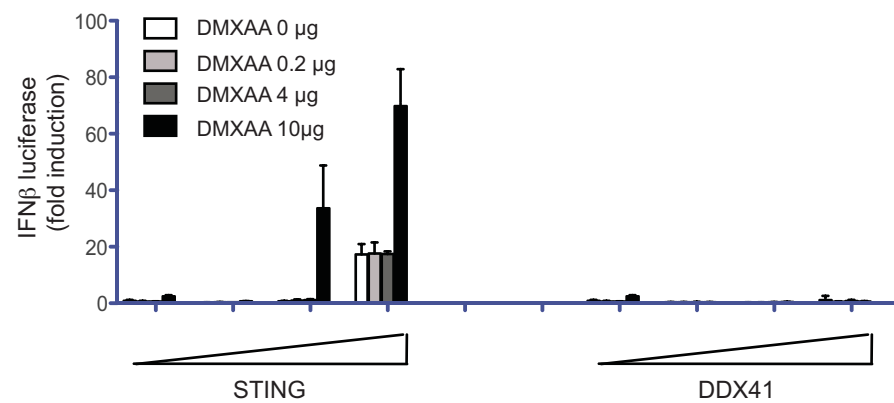**Suppl. Figure 1**



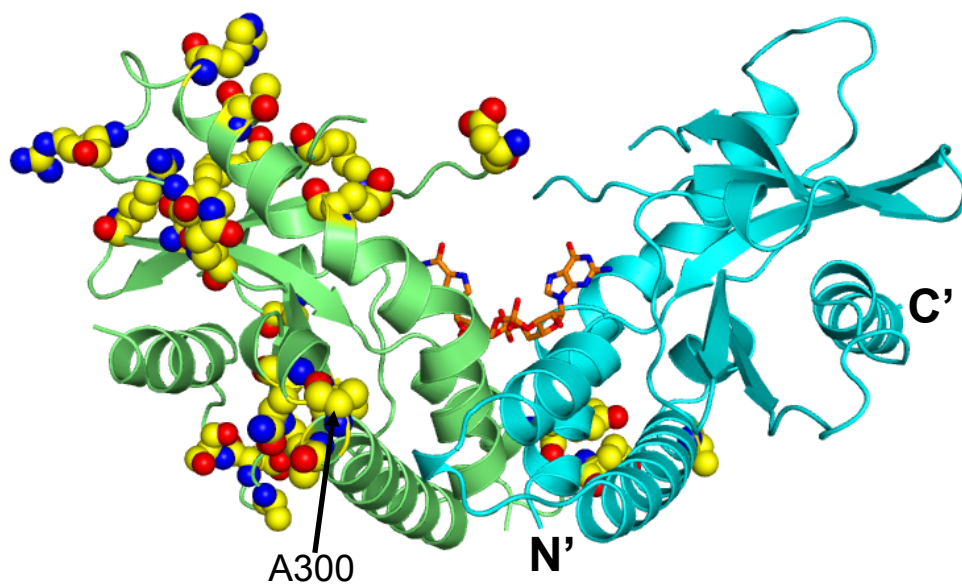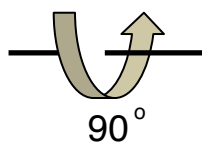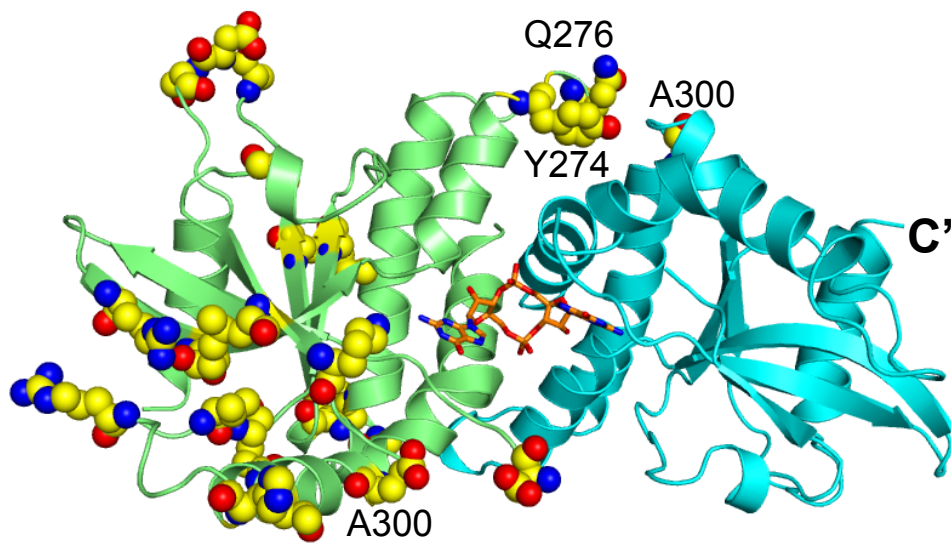

**Suppl. Fig. 3**

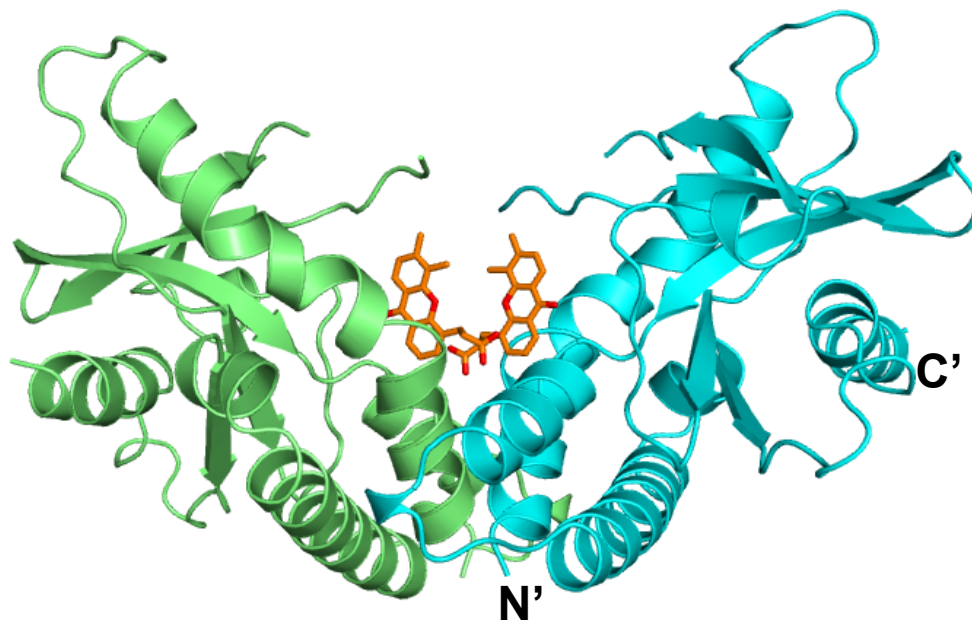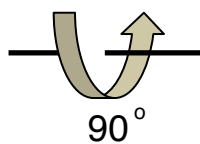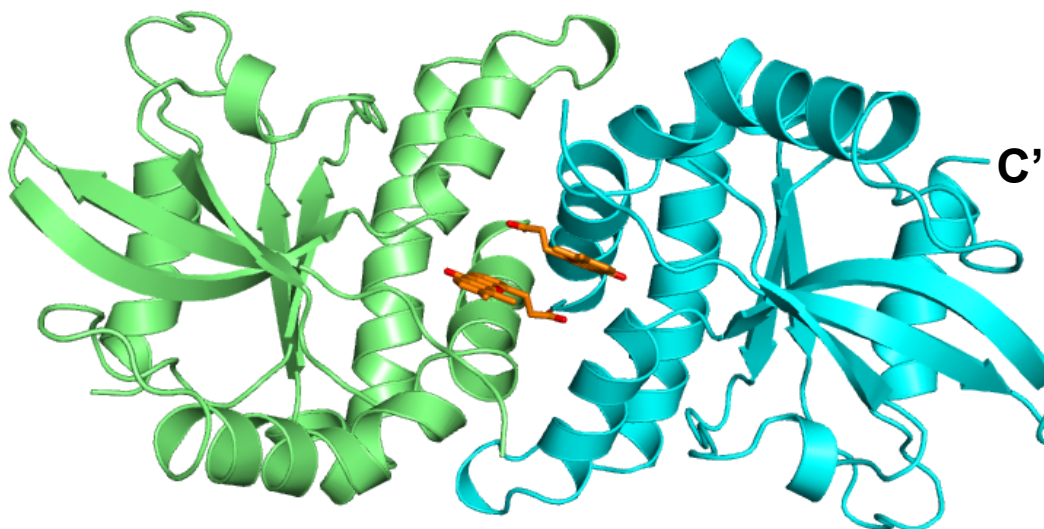

**Suppl. Fig. 4.**
